# Supplementary material for: Aggregated Tau Measured by Visual Interpretation of Flortaucipir Positron Emission Tomography and the Associated Risk of Clinical Progression of Mild Cognitive Impairment and Alzheimer Disease: Results From 2 Phase III Clinical Trials
Source: PubMed Central journal article supplement — JAMA Neurol. 2021 Feb 15;78(4):445–53. doi: 10.1001/jamaneurol.2020.5505 (PMC7885097; doi:10.1001/jamaneurol.2020.5505), 2021-02-15

## Supplemental Online Content

Lu M, Pontecorvo MJ, Devous MD, et al; for the AVID Collaborators. Aggregated tau measured by visual interpretation of flortaucipir positron emission tomography and the associated risk of clinical progression: results from 2 phase III clinical trials. *JAMA Neurol.* Published online February 15, 2020.  
doi:10.1001/jamaneurol.2020.5505

**eMethods.** PET Imaging Acquisition and Visual Interpretation

**eTable 1.** Inter-reader Consistency of Flortaucipir Scan Visual Interpretation

**eTable 2.** Risk for Clinical Progression Based on Individual Reader's Visual Interpretation Results: Advanced AD Pattern vs. Non-Advanced AD Pattern

**eTable 3.** Risk for Clinical Progression Based on Individual Reader's Visual Interpretation Results: Advanced AD Pattern vs. Non-Advanced AD Pattern

**eFigure 1.** Change from Baseline at 18 Months by Flortaucipir Scan Patterns, Pooled Data from Study 1 and Study 2

**eFigure 2.** Change from Baseline Values at Each Follow-up Visit by Amyloid-Tau Groups

**eFigure 3.** Change from Baseline: Adjusted Mean Values at 18 Months by Baseline MMSE, Pooled Data

**eFigure 4.** Flow Diagram for Subject Enrollment and Disposition

This supplemental material has been provided by the authors to give readers additional information about their work.

## **eMethod. PET Imaging Acquisition and Visual Interpretation**

Study 1 participants received an intravenous administration of 370 (+/- 10%) MBq of Flortaucipir F 18 and underwent 20 min of PET imaging (4 x 5 min acquisition frames) beginning approximately 80 min after injection. Study 2 participants received an intravenous administration of 240 (+/- 10%) MBq of Flortaucipir F 18 and underwent 30 min of PET imaging (6 x 5 min acquisition frames) beginning approximately 75 min after injection. Flortaucipir imaging was obtained a mean±SD of 24±10.7 days from baseline clinical assessments in Study 1, and 17±18.3 days from baseline measures in Study 2.

Scans that were considered unevaluable (e.g., head out of field of view; severe motion; low counts) by at least 3 of the 5 readers were not used in any efficacy analyses. Following the criteria as shown in Figure 1, readers examined specified brain regions and scored each as negative or positive depending on the presence of elevated flortaucipir signal more than 65% above the cerebellar reference region signal. Readers then gave an assessment of global tau uptake as either an advanced, moderate, or negative AD tau pattern.

**eTable 1. Inter-reader Consistency of Flortaucipir Scan Visual Interpretation**

|                | <b>Number of Scans</b> | <b>% agreement</b> | <b>Fleiss' Kappa<br/>95% CI</b> |
|----------------|------------------------|--------------------|---------------------------------|
| <b>Study 1</b> | 159                    | 94.5%              | 0.89<br>(0.84, 0.94)            |
| <b>Study 2</b> | 205                    | 91.4%              | 0.75<br>(0.71, 0.80)            |

**Note:** % agreement was calculated as the sum of agreeable pairs of readers from each scan, divided by total number of possible combinations of reading pairs.

**eTable 2. Risk for Clinical Progression Based on Individual Reader's Visual Interpretation Results: Advanced AD Pattern vs. Non-Advanced AD Pattern**

|        |                 | Study 1           |                   |                          |              | Study 2            |                   |                          |             | Pooled             |                   |                          |                  |
|--------|-----------------|-------------------|-------------------|--------------------------|--------------|--------------------|-------------------|--------------------------|-------------|--------------------|-------------------|--------------------------|------------------|
|        |                 | % Event           |                   | HR<br>95% CI             | P-value      | % Event            |                   | RR<br>95% CI             | P-value     | % Event            |                   | RR<br>95% CI             | P-value          |
|        | Reader          | Advanced          | Non-Advanced      |                          |              | Advanced           | Non-Advanced      |                          |             | Advanced           | Non-Advanced      |                          |                  |
| CDR-SB | Reader 1        | 36 (58.1%)        | 31 (44.9%)        | 1.64 (1.00, 2.67)        | 0.05         | 117 (75.5%)        | 26 (52.0%)        | 1.52 (1.15, 2.01)        | 0.003       | 145 (71.4%)        | 50 (44.6%)        | 1.49 (1.18, 1.87)        | 0.001            |
|        | Reader 2        | 37 (56.1%)        | 30 (46.2%)        | 1.59 (0.97, 2.60)        | 0.06         | 112 (74.2%)        | 31 (57.4%)        | 1.33 (1.04, 1.70)        | 0.02        | 141 (70.5%)        | 54 (47.0%)        | 1.39 (1.12, 1.72)        | 0.003            |
|        | Reader 3        | 33 (56.9%)        | 34 (46.6%)        | 1.48 (0.91, 2.42)        | 0.11         | 126 (73.3%)        | 17 (51.5%)        | 1.46 (1.05, 2.04)        | 0.03        | 152 (69.7%)        | 43 (44.3%)        | 1.40 (1.09, 1.79)        | 0.009            |
|        | Reader 4        | 39 (59.1%)        | 28 (43.1%)        | 1.68 (1.02, 2.74)        | 0.04         | 114 (75.0%)        | 29 (54.7%)        | 1.46 (1.13, 1.89)        | 0.004       | 145 (71.4%)        | 50 (44.6%)        | 1.49 (1.19, 1.87)        | <0.001           |
|        | Reader 5        | 39 (59.1%)        | 28 (43.1%)        | 1.70 (1.04, 2.77)        | 0.04         | 119 (72.6%)        | 24 (58.5%)        | 1.25 (0.96, 1.64)        | 0.10        |                    |                   |                          |                  |
|        | <b>Majority</b> | <b>36 (57.1%)</b> | <b>31 (45.6%)</b> | <b>1.58 (0.97, 2.85)</b> | <b>0.07</b>  | <b>119 (73.5%)</b> | <b>24 (55.8%)</b> | <b>1.36 (1.03, 1.79)</b> | <b>0.03</b> | <b>147 (70.0%)</b> | <b>48 (45.7%)</b> | <b>1.40 (1.11, 1.76)</b> | <b>0.005</b>     |
| MMSE   | Reader 1        | 30 (48.4%)        | 13 (18.8%)        | 2.54 (1.30, 4.96)        | 0.006        | 109 (70.8%)        | 24 (49.0%)        | 1.40 (1.01, 1.94)        | 0.04        | 131 (65.2%)        | 34 (30.6%)        | 1.68 (1.24, 2.29)        | <0.001           |
|        | Reader 2        | 30 (45.5%)        | 13 (20.0%)        | 2.26 (1.15, 4.41)        | 0.02         | 108 (72.0%)        | 25 (47.2%)        | 1.50 (1.09, 2.06)        | 0.01        | 131 (66.2%)        | 34 (29.8%)        | 1.81 (1.34, 2.45)        | <0.001           |
|        | Reader 3        | 29 (50.0%)        | 14 (19.2%)        | 2.42 (1.25, 4.67)        | 0.009        | 116 (67.8%)        | 17 (53.1%)        | 1.19 (0.83, 1.71)        | 0.35        | 138 (63.9%)        | 27 (28.1%)        | 1.66 (1.16, 2.37)        | 0.006            |
|        | Reader 4        | 31 (47.0%)        | 12 (18.5%)        | 2.55 (1.29, 5.04)        | 0.007        | 105 (69.5%)        | 28 (53.8%)        | 1.24 (0.92, 1.67)        | 0.15        | 128 (63.7%)        | 37 (33.3%)        | 1.52 (1.14, 2.02)        | 0.004            |
|        | Reader 5        | 31 (47.0%)        | 12 (18.5%)        | 2.42 (1.22, 4.80)        | 0.01         | 112 (68.7%)        | 21 (52.5%)        | 1.23 (0.88, 1.72)        | 0.22        |                    |                   |                          |                  |
|        | <b>Majority</b> | <b>30 (47.6%)</b> | <b>13 (19.1%)</b> | <b>2.51 (1.29, 4.89)</b> | <b>0.007</b> | <b>112 (69.6%)</b> | <b>21 (50.0%)</b> | <b>1.35 (0.96, 1.89)</b> | <b>0.08</b> | <b>134 (64.4%)</b> | <b>31 (29.8%)</b> | <b>1.68 (1.22, 2.32)</b> | <b>0.001</b>     |
| ADAS   | Reader 1        | 35 (56.5%)        | 23 (33.3%)        | 1.37 (0.77, 2.44)        | 0.28         | 95 (63.3%)         | 17 (34.7%)        | 1.75 (1.15, 2.65)        | 0.009       | 121 (61.1%)        | 34 (30.6%)        | 1.71 (1.23, 2.36)        | 0.001            |
|        | Reader 2        | 37 (56.1%)        | 21 (32.3%)        | 1.56 (0.87, 2.78)        | 0.13         | 93 (63.7%)         | 19 (35.8%)        | 1.70 (1.14, 2.53)        | 0.009       | 119 (61.0%)        | 36 (31.6%)        | 1.65 (1.21, 2.26)        | 0.001            |
|        | Reader 3        | 33 (56.9%)        | 25 (34.2%)        | 1.30 (0.74, 2.29)        | 0.37         | 101 (60.5%)        | 11 (34.4%)        | 1.61 (0.97, 2.67)        | 0.06        | 127 (59.6%)        | 28 (29.2%)        | 1.74 (1.21, 2.51)        | 0.003            |
|        | Reader 4        | 37 (56.1%)        | 21 (32.3%)        | 1.55 (0.88, 2.75)        | 0.13         | 95 (64.6%)         | 17 (32.7%)        | 1.91 (1.26, 2.91)        | 0.003       | 122 (61.6%)        | 33 (29.7%)        | 1.80 (1.30, 2.49)        | <0.001           |
|        | Reader 5        | 37 (56.1%)        | 21 (32.3%)        | 1.49 (0.84, 2.67)        | 0.17         | 97 (61.0%)         | 15 (37.5%)        | 1.49 (0.97, 2.31)        | 0.07        |                    |                   |                          |                  |
|        | <b>Majority</b> | <b>35 (55.6%)</b> | <b>23 (33.8%)</b> | <b>1.36 (0.77, 2.41)</b> | <b>0.29</b>  | <b>98 (62.4%)</b>  | <b>14 (33.3%)</b> | <b>1.77 (1.12, 2.80)</b> | <b>0.01</b> | <b>124 (60.5%)</b> | <b>31 (29.8%)</b> | <b>1.73 (1.35, 2.25)</b> | <b>&lt;0.001</b> |

|                                                                                                                      |                 | Study 1           |                   |                          |                  | Study 2            |                   |                          |             | Pooled             |                   |                          |                  |
|----------------------------------------------------------------------------------------------------------------------|-----------------|-------------------|-------------------|--------------------------|------------------|--------------------|-------------------|--------------------------|-------------|--------------------|-------------------|--------------------------|------------------|
|                                                                                                                      |                 | % Event           |                   | HR<br>95% CI             | P-value          | % Event            |                   | RR<br>95% CI             | P-value     | % Event            |                   | RR<br>95% CI             | P-value          |
|                                                                                                                      | Reader          | Advanced          | Non-Advanced      |                          |                  | Advanced           | Non-Advanced      |                          |             | Advanced           | Non-Advanced      |                          |                  |
| FAQ                                                                                                                  | Reader 1        | 47 (75.8%)        | 24 (34.8%)        | 2.88 (1.73, 4.80)        | <0.001           | 107 (70.9%)        | 27 (55.1%)        | 1.34 (1.02, 1.77)        | 0.04        | 142 (71.4%)        | 46 (41.4%)        | 1.72 (1.35, 2.19)        | <0.001           |
|                                                                                                                      | Reader 2        | 49 (74.2%)        | 22 (33.8%)        | 2.76 (1.65, 4.62)        | <0.001           | 105 (70.9%)        | 29 (55.8%)        | 1.33 (1.01, 1.73)        | 0.04        | 141 (71.6%)        | 47 (41.6%)        | 1.71 (1.35, 2.17)        | <0.001           |
|                                                                                                                      | Reader 3        | 44 (75.9%)        | 27 (37.0%)        | 2.63 (1.60, 4.34)        | <0.001           | 116 (69.5%)        | 18 (54.5%)        | 1.29 (0.92, 1.80)        | 0.14        | 150 (70.4%)        | 38 (39.2%)        | 1.78 (1.35, 2.34)        | <0.001           |
|                                                                                                                      | Reader 4        | 50 (75.8%)        | 21 (32.3%)        | 3.06 (1.81, 5.19)        | <0.001           | 105 (70.9%)        | 29 (55.8%)        | 1.37 (1.05, 1.79)        | 0.02        | 143 (71.9%)        | 45 (40.5%)        | 1.76 (1.38, 2.24)        | <0.001           |
|                                                                                                                      | Reader 5        | 50 (75.8%)        | 21 (32.3%)        | 2.85 (1.69, 4.81)        | <0.001           | 109 (68.6%)        | 25 (61.0%)        | 1.11 (0.85, 1.46)        | 0.44        |                    |                   |                          |                  |
|                                                                                                                      | <b>Majority</b> | <b>47 (74.6%)</b> | <b>24 (35.3%)</b> | <b>2.79 (1.67, 4.64)</b> | <b>&lt;0.001</b> | <b>111 (70.3%)</b> | <b>23 (54.8%)</b> | <b>1.32 (0.98, 1.78)</b> | <b>0.06</b> | <b>146 (70.5%)</b> | <b>42 (40.4%)</b> | <b>1.74 (1.35, 2.25)</b> | <b>&lt;0.001</b> |
| CDR Global                                                                                                           | Reader 1        | 28 (45.2%)        | 20 (29.0%)        | 2.52 (1.40, 4.52)        | 0.002            | 71 (45.8%)         | 16 (32.0%)        | 1.59 (1.00, 2.50)        | 0.05        | 94 (46.5%)         | 31 (27.7%)        | 1.78 (1.26, 2.52)        | 0.001            |
|                                                                                                                      | Reader 2        | 29 (43.9%)        | 19 (29.2%)        | 2.30 (1.28, 4.15)        | 0.006            | 68 (45.0%)         | 19 (35.2%)        | 1.37 (0.89, 2.11)        | 0.15        | 90 (45.2%)         | 35 (30.4%)        | 1.55 (1.12, 2.15)        | 0.009            |
|                                                                                                                      | Reader 3        | 25 (43.1%)        | 23 (31.5%)        | 2.08 (1.17, 3.69)        | 0.013            | 75 (43.6%)         | 12 (36.4%)        | 1.32 (0.79, 2.19)        | 0.29        | 96 (44.2%)         | 29 (29.9%)        | 1.55 (1.07, 2.25)        | 0.02             |
|                                                                                                                      | Reader 4        | 29 (43.9%)        | 19 (29.2%)        | 2.23 (1.23, 4.04)        | 0.008            | 68 (44.7%)         | 19 (35.8%)        | 1.43 (0.93, 2.19)        | 0.10        | 91 (45.0%)         | 34 (30.4%)        | 1.55 (1.12, 2.16)        | 0.009            |
|                                                                                                                      | Reader 5        | 29 (43.9%)        | 19 (29.2%)        | 2.07 (1.15, 3.76)        | 0.02             | 72 (43.9%)         | 15 (36.6%)        | 1.29 (0.81, 2.05)        | 0.29        |                    |                   |                          |                  |
|                                                                                                                      | <b>Majority</b> | <b>28 (44.4%)</b> | <b>20 (29.4%)</b> | <b>2.37 (1.32, 4.26)</b> | <b>0.004</b>     | <b>71 (43.8%)</b>  | <b>16 (37.2%)</b> | <b>1.28 (0.82, 2.02)</b> | <b>0.28</b> | <b>94 (45.0%)</b>  | <b>31 (29.5%)</b> | <b>1.60 (1.13, 2.27)</b> | <b>0.009</b>     |
| Note: Study 1 and Study 2 used different reader for reader #5. Thus, pooled analyses were not conducted for Reader 5 |                 |                   |                   |                          |                  |                    |                   |                          |             |                    |                   |                          |                  |

**eTable 3. Risk for Clinical Progression Based on Individual Reader’s Visual Interpretation Results: Advanced AD Pattern vs. Non-Advanced AD Pattern**

|        |                 | Study 1             |                     |              | Study 2             |                     |                  | Pooled              |                     |                  |
|--------|-----------------|---------------------|---------------------|--------------|---------------------|---------------------|------------------|---------------------|---------------------|------------------|
|        |                 | LS Means (SE)       |                     | P-value      | LS Means (SE)       |                     | P-value          | LS Means (SE)       |                     | P-value          |
|        | Reader          | Advanced            | Non-Advanced        |              | Advanced            | Non-Advanced        |                  | Advanced            | Non-Advanced        |                  |
| CDR-SB | Reader 1        | 2.16 (0.35)         | 0.61 (0.31)         | 0.001        | 2.33 (0.19)         | 1.35 (0.30)         | 0.003            | 2.18 (0.15)         | 0.99 (0.19)         | <0.001           |
|        | Reader 2        | 2.06 (0.34)         | 0.65 (0.32)         | 0.003        | 2.29 (0.19)         | 1.51 (0.29)         | 0.02             | 2.16 (0.15)         | 1.04 (0.19)         | <0.001           |
|        | Reader 3        | 2.13 (0.36)         | 0.71 (0.31)         | 0.003        | 2.23 (0.18)         | 1.39 (0.36)         | 0.03             | 2.12 (0.15)         | 0.97 (0.21)         | <0.001           |
|        | Reader 4        | 2.01 (0.34)         | 0.66 (0.32)         | 0.005        | 2.29 (0.19)         | 1.42 (0.29)         | 0.007            | 2.13 (0.15)         | 1.05 (0.19)         | <0.001           |
|        | Reader 5        | 2.10 (0.33)         | 0.58 (0.32)         | 0.002        | 2.22 (0.19)         | 1.55 (0.32)         | 0.05             |                     |                     |                  |
|        | <b>Majority</b> | <b>2.09 (0.35)</b>  | <b>0.66 (0.32)</b>  | <b>0.003</b> | <b>2.22 (0.22)</b>  | <b>1.31 (0.38)</b>  | <b>0.03</b>      | <b>2.28 (0.17)</b>  | <b>0.98 (0.24)</b>  | <b>&lt;0.001</b> |
| MMSE   | Reader 1        | -3.35 (0.67)        | -0.30 (0.59)        | 0.001        | -4.87 (0.34)        | -2.12 (0.53)        | <0.001           | -4.18 (0.27)        | -1.32 (0.35)        | <0.001           |
|        | Reader 2        | -3.13 (0.67)        | -0.39 (0.61)        | 0.003        | -4.91 (0.34)        | -2.24 (0.51)        | <0.001           | -4.15 (0.27)        | -1.40 (0.35)        | <0.001           |
|        | Reader 3        | -3.50 (0.68)        | -0.32 (0.58)        | 0.001        | -4.52 (0.33)        | -2.53 (0.66)        | 0.005            | -4.00 (0.27)        | -1.38 (0.39)        | <0.001           |
|        | Reader 4        | -3.15 (0.65)        | -0.32 (0.61)        | 0.002        | -4.70 (0.34)        | -2.54 (0.53)        | <0.001           | -3.99 (0.27)        | -1.59 (0.36)        | <0.001           |
|        | Reader 5        | -3.19 (0.65)        | -0.29 (0.61)        | 0.002        | -4.59 (0.34)        | -2.71 (0.59)        | 0.004            |                     |                     |                  |
|        | <b>Majority</b> | <b>-3.29 (0.67)</b> | <b>-0.33 (0.59)</b> | <b>0.001</b> | <b>-4.89 (0.38)</b> | <b>-2.12 (0.65)</b> | <b>&lt;0.001</b> | <b>-4.13 (0.31)</b> | <b>-1.27 (0.42)</b> | <b>&lt;0.001</b> |
| ADAS   | Reader 1        | 6.47 (1.01)         | 2.45 (0.91)         | 0.005        | 6.03 (0.58)         | 2.76 (0.91)         | 0.001            | 6.15 (0.44)         | 2.70 (0.58)         | <0.001           |
|        | Reader 2        | 6.46 (0.98)         | 2.35 (0.92)         | 0.004        | 6.11 (0.58)         | 2.83 (0.87)         | 0.001            | 6.19 (0.44)         | 2.70 (0.57)         | <0.001           |
|        | Reader 3        | 6.84 (1.02)         | 2.32 (0.87)         | 0.001        | 5.71 (0.56)         | 2.90 (1.09)         | 0.02             | 6.11 (0.43)         | 2.43 (0.62)         | <0.001           |
|        | Reader 4        | 6.09 (0.97)         | 2.53 (0.93)         | 0.01         | 6.06 (0.57)         | 2.60 (0.89)         | <0.001           | 6.15 (0.44)         | 2.68 (0.57)         | <0.001           |
|        | Reader 5        | 5.94 (0.98)         | 2.71 (0.94)         | 0.02         | 5.83 (0.57)         | 3.06 (0.98)         | 0.01             |                     |                     |                  |
|        | <b>Majority</b> | <b>6.41 (1.00)</b>  | <b>2.50 (0.91)</b>  | <b>0.006</b> | <b>6.53 (0.66)</b>  | <b>1.97 (1.18)</b>  | <b>0.006</b>     | <b>6.40 (0.51)</b>  | <b>2.30 (0.71)</b>  | <b>0.001</b>     |
|        |                 |                     |                     |              |                     |                     |                  |                     |                     |                  |
|        |                 |                     |                     |              |                     |                     |                  |                     |                     |                  |
|        |                 |                     |                     |              |                     |                     |                  |                     |                     |                  |

|                                                                                                                      |                 | Study 1            |                    |                  | Study 2            |                    |             | Pooled             |                    |                  |
|----------------------------------------------------------------------------------------------------------------------|-----------------|--------------------|--------------------|------------------|--------------------|--------------------|-------------|--------------------|--------------------|------------------|
|                                                                                                                      |                 | LS Means (SE)      |                    | P-value          | LS Means (SE)      |                    | P-value     | LS Means (SE)      |                    | P-value          |
|                                                                                                                      | Reader          | Advanced           | Non-Advanced       |                  | Advanced           | Non-Advanced       |             | Advanced           | Non-Advanced       |                  |
| FAQ                                                                                                                  | Reader 1        | 7.02 (0.75)        | 1.74 (0.69)        | <0.001           | 5.20 (0.47)        | 2.56 (0.75)        | 0.002       | 6.15 (0.37)        | 2.00 (0.47)        | <0.001           |
|                                                                                                                      | Reader 2        | 6.84 (0.74)        | 1.73 (0.70)        | <0.001           | 5.14 (0.48)        | 2.87 (0.74)        | 0.006       | 6.02 (0.37)        | 2.22 (0.47)        | <0.001           |
|                                                                                                                      | Reader 3        | 6.81 (0.78)        | 2.14 (0.68)        | <0.001           | 5.04 (0.46)        | 2.33 (0.89)        | 0.005       | 6.08 (0.36)        | 1.73 (0.51)        | <0.001           |
|                                                                                                                      | Reader 4        | 6.74 (0.73)        | 1.72 (0.71)        | <0.001           | 5.15 (0.47)        | 2.66 (0.74)        | 0.002       | 6.04 (0.37)        | 2.14 (0.47)        | <0.001           |
|                                                                                                                      | Reader 5        | 6.86 (0.72)        | 1.60 (0.70)        | <0.001           | 4.98 (0.47)        | 3.05 (0.80)        | 0.03        |                    |                    |                  |
|                                                                                                                      | <b>Majority</b> | <b>6.93 (0.75)</b> | <b>1.78 (0.69)</b> | <b>&lt;0.001</b> | <b>5.22 (0.54)</b> | <b>2.67 (0.90)</b> | <b>0.01</b> | <b>6.15 (0.40)</b> | <b>2.10 (0.55)</b> | <b>&lt;0.001</b> |
| Note: Study 1 and Study 2 used different reader for reader #5. Thus, pooled analyses were not conducted for Reader 5 |                 |                    |                    |                  |                    |                    |             |                    |                    |                  |

**eFigure 1. Change from Baseline at 18 Months by Flortaucipir Scan Patterns, Pooled Data from Study 1 and Study 2**

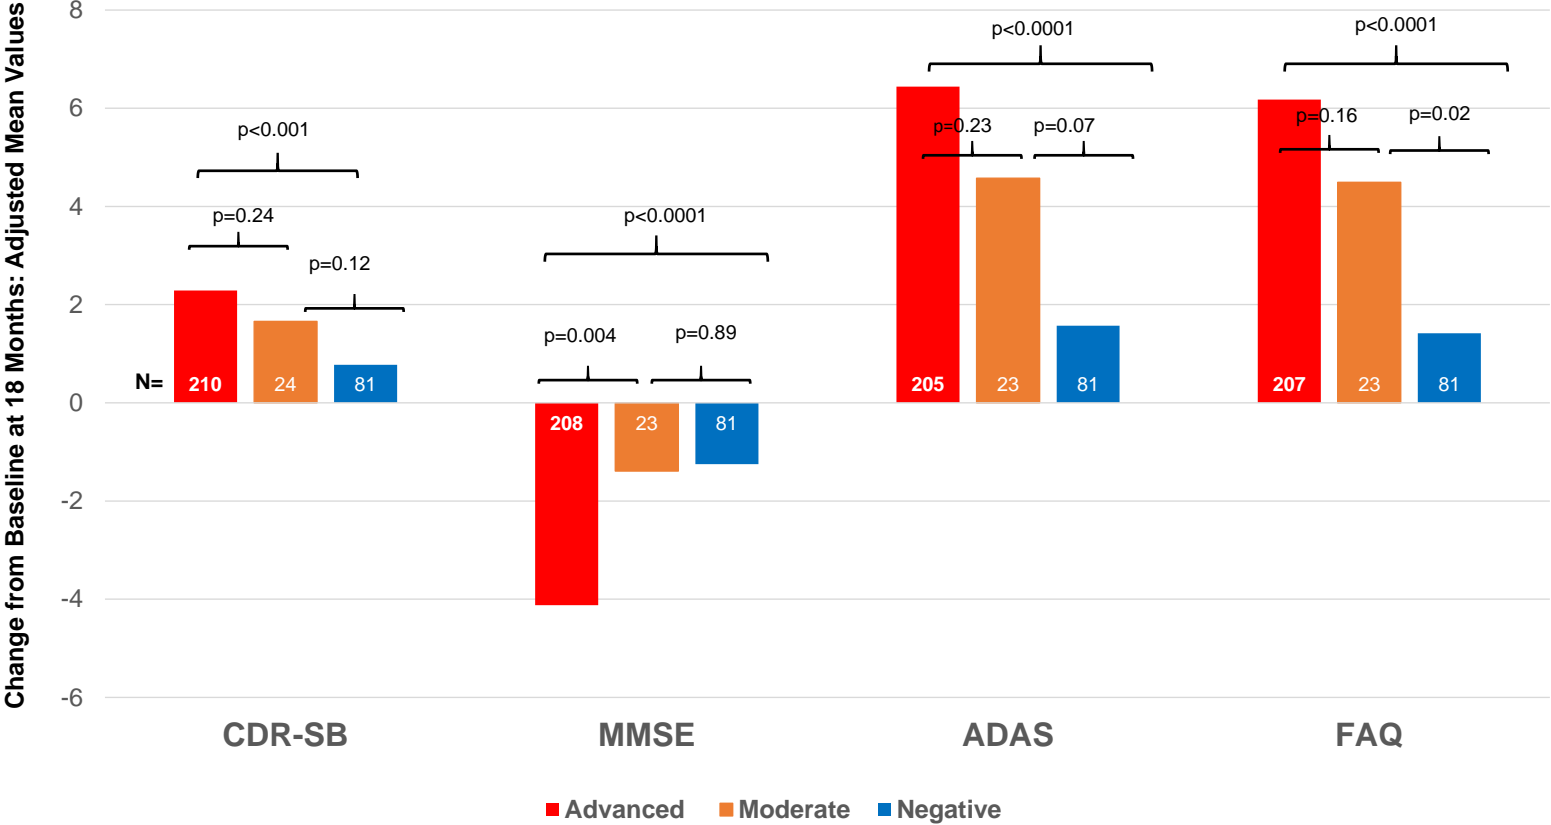



eFigure 2. Change from Baseline Values at Each Follow-up Visit by Amyloid-Tau Groups

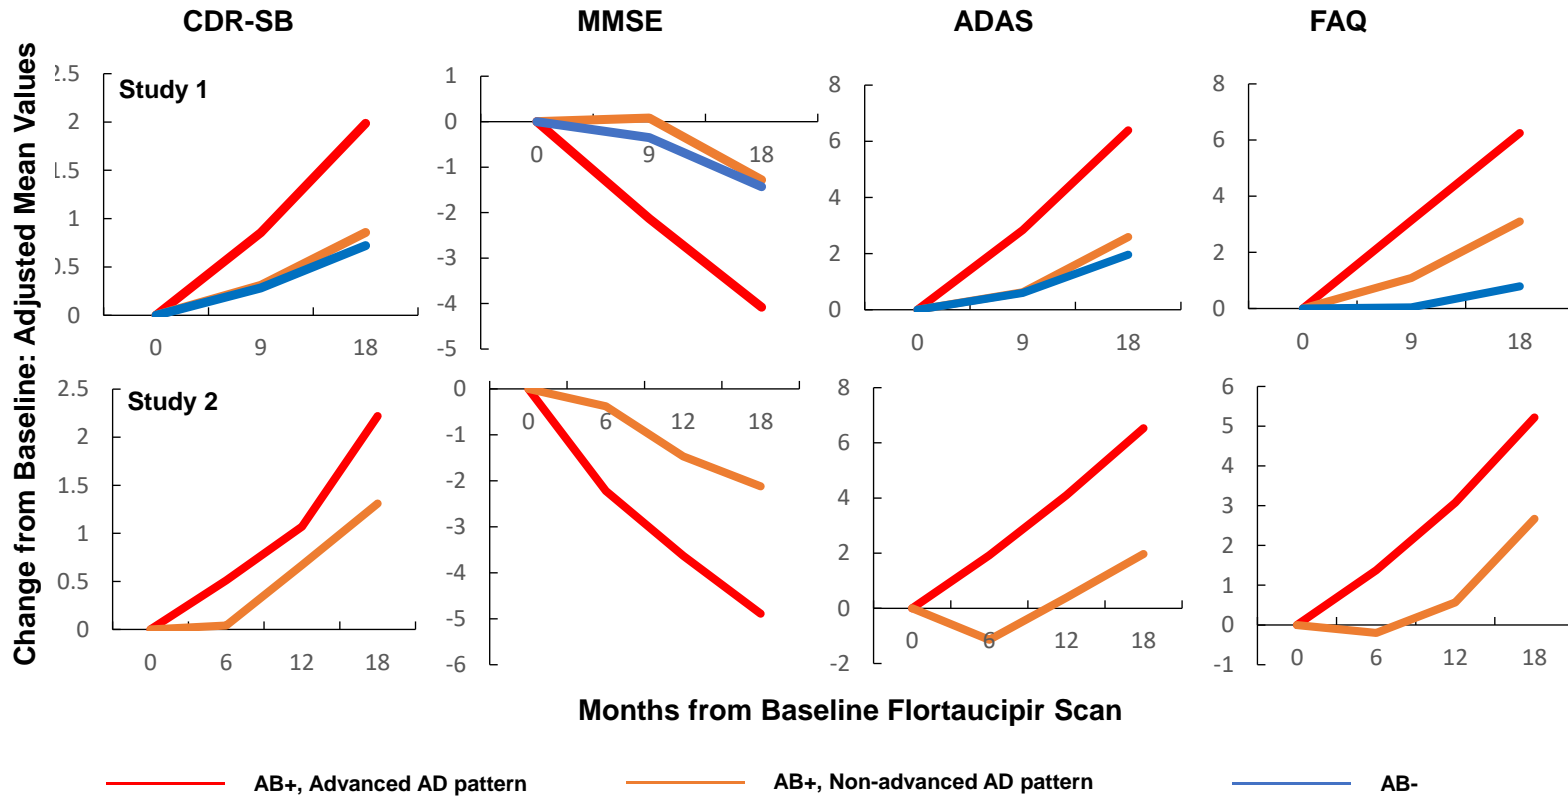

eFigure 3. Change from Baseline: Adjusted Mean Values at 18 Months by Baseline MMSE, Pooled Data

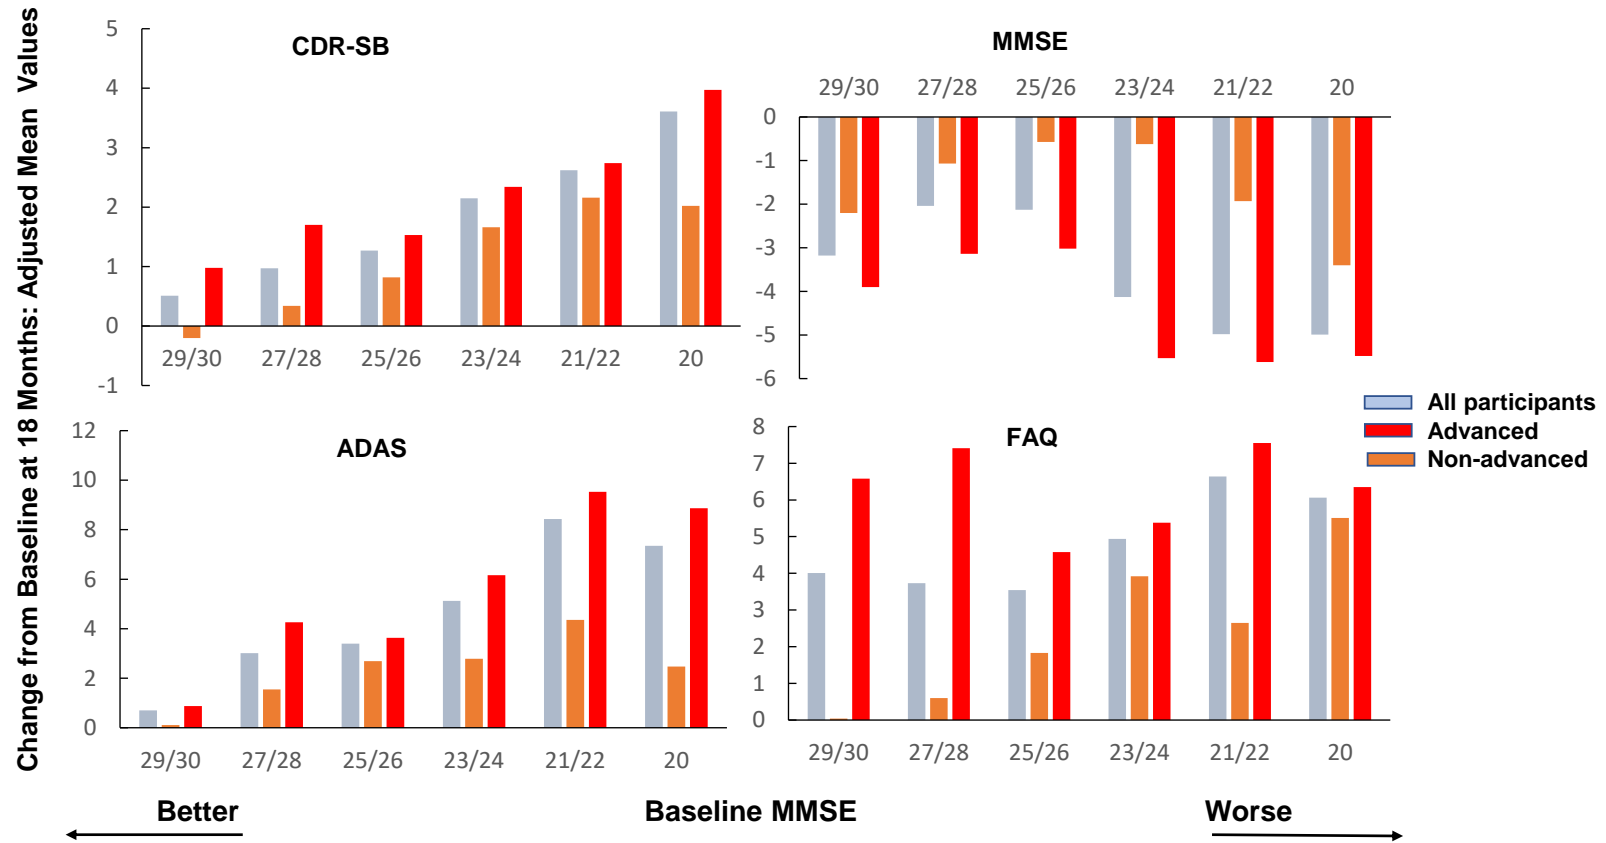

**eFigure 4. Flow diagram for subject enrollment and disposition**

**Study 1**

**Study 2**

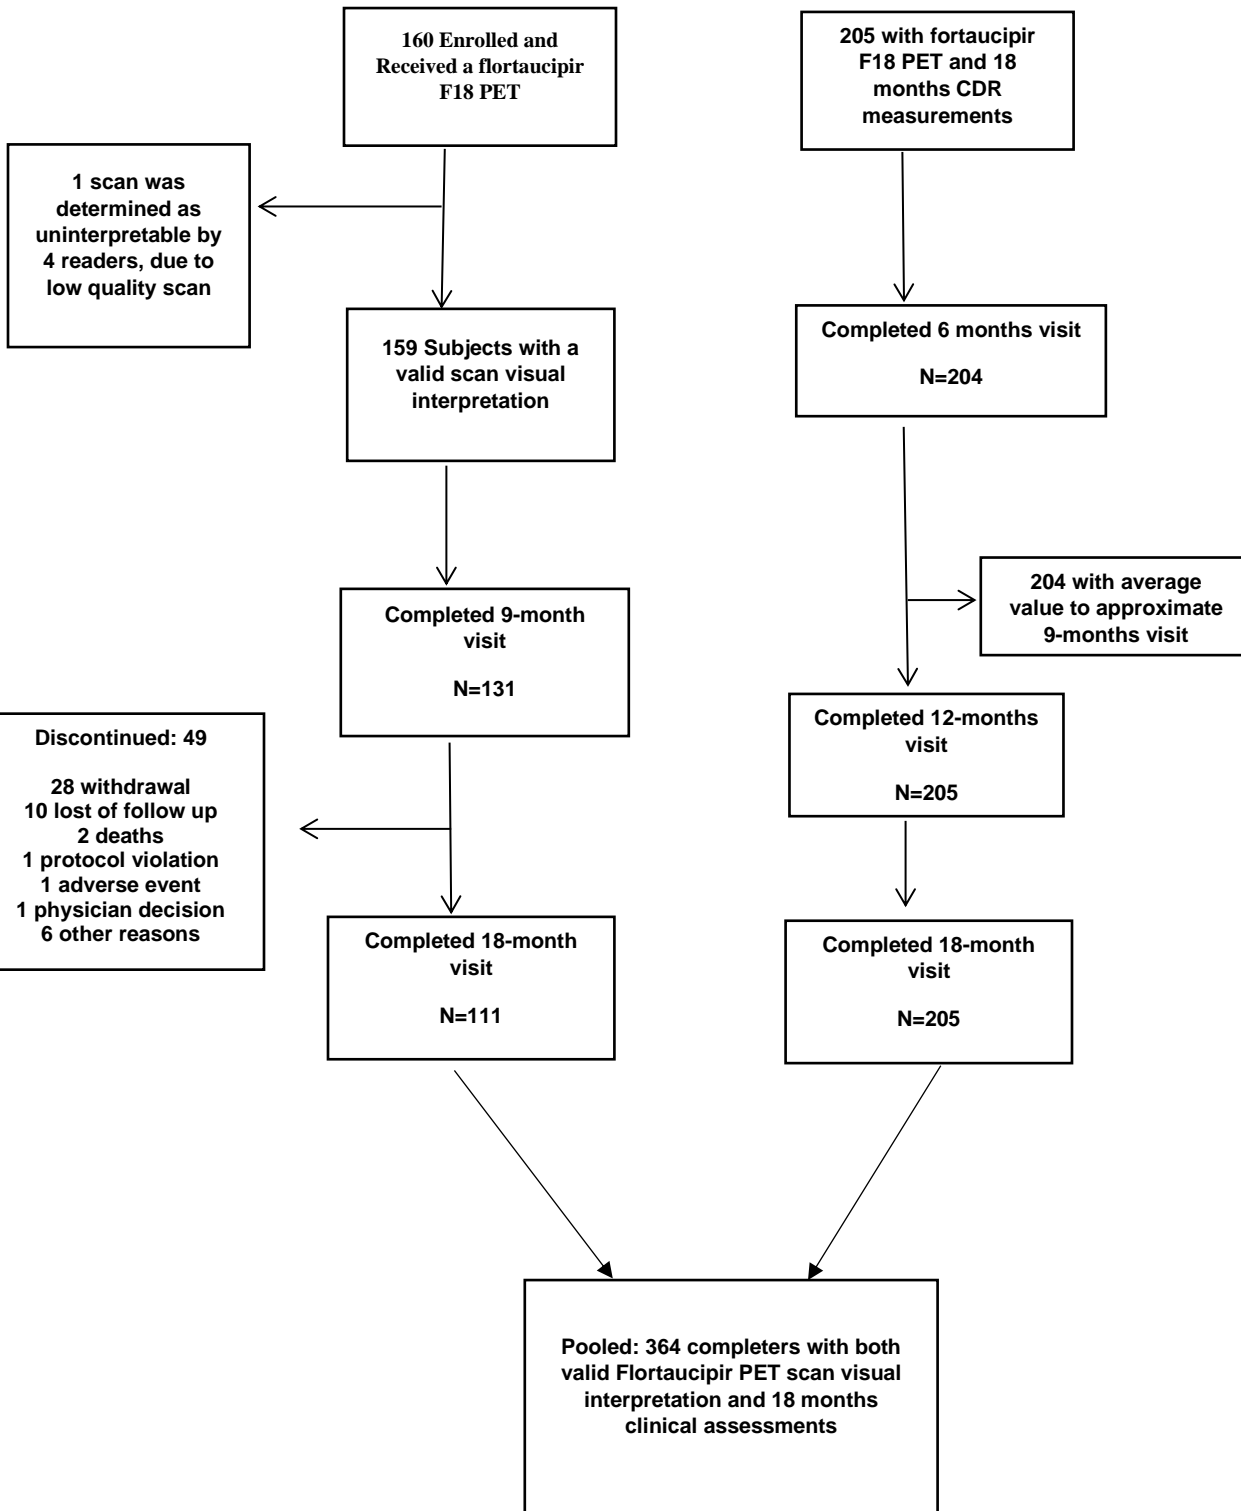

Supplement: jamaneurol-e205505-s001.pdf [file jamaneurol-e205505-s001.pdf]
