# Supplementary material for: Aggregated Tau Measured by Visual Interpretation of Flortaucipir Positron Emission Tomography and the Associated Risk of Clinical Progression of Mild Cognitive Impairment and Alzheimer Disease: Results From 2 Phase III Clinical Trials
Source: PubMed Central journal article supplement — JAMA Neurol. 2021 Feb 15;78(4):445–53. doi: 10.1001/jamaneurol.2020.5505 (PMC7885097; doi:10.1001/jamaneurol.2020.5505), 2021-02-15
Supplement: jamaneurol-e205505-s002.pdf [file jamaneurol-e205505-s002.pdf]

Supplemental Online Content: Nonauthor Collaborators

\*Indicates required information. Only first name, last name, and suffix will appear in PubMed.

**Group Name: \* AVID Collaborators**

| First Name, Middle Initial* | Last Name*          | Suffix* | Academic Degrees | Institution                                                                               | Location (city, state/province, country) | Role or Contribution, eg, chair, principal investigator | Subgroup, eg, Steering Committee |
|-----------------------------|---------------------|---------|------------------|-------------------------------------------------------------------------------------------|------------------------------------------|---------------------------------------------------------|----------------------------------|
| John S. G.                  | Edmunds             |         | MD, PhD          | Greensboro Radiology                                                                      | Greensboro, NC                           | PX01 Reader                                             |                                  |
| Brian K.                    | McCandless          |         | MD               | Albany Veterans Administration Medical Center                                             | Albany, NY                               | PX01 Reader                                             |                                  |
| Joseph W.                   | Sam                 |         | MD, PhD          | TRA Medical Imaging                                                                       | Tacoma, WA                               | PX01 Reader                                             |                                  |
| E. Gordon                   | DePuey              |         | MD               | Mt. Sinai and St. Luke's Roosevelt Hospitals                                              | New York, NY                             | PX01 Reader                                             |                                  |
| Alena Tammie                | Kreychman Benzinger |         | MD<br>MD         | Baystate Medical Center<br>Washington University                                          | Springfield, MA<br>St. Louis, MO         | PX01 Reader<br>A05 Principal Investigator               |                                  |
| Craig                       | Curtis              |         | MD               | BioClinica Research                                                                       | Orlando, FL                              | A05 Principal Investigator                              |                                  |
| John                        | Olichney            |         | MD               | Alzheimer's Disease Center<br>Department of Neurology,<br>University of California, Davis | Sacramento, CA                           | A05 Principal Investigator                              |                                  |
| Jose                        | Delagandara         |         | MD               | Quantum Laboratories, Inc.                                                                | Deerfield Beach, FL                      | A05 Principal Investigator                              |                                  |
| Murali                      | Doraiswamy          |         | MD               | Duke University Medical Center                                                            | Durham, NC                               | A05 Principal Investigator                              |                                  |
| Jaideep                     | Sohi                |         | MD               | No Cal PET Imaging Center                                                                 | Sacramento, CA                           | A05 Principal Investigator                              |                                  |
| Gigi                        | Lefebvre            |         | MD               | Meridien Research                                                                         | St. Petersburg, FL                       | A05 Principal Investigator                              |                                  |
| Pierre                      | Tariot              |         | MD               | Banner Alzheimer's Institute                                                              | Phoenix, AZ                              | A05 Principal Investigator                              |                                  |
| Pradeep                     | Garg                |         | MD               | Biomedical Research Foundation                                                            | Shreveport, LA                           | A05 Principal Investigator                              |                                  |
| David                       | Russell             |         | MD               | Institute for Neurodegenerative Disorders                                                 | New Haven, CT                            | A05 Principal Investigator                              |                                  |

Supplemental Online Content: Nonauthor Collaborators

\*Indicates required information. Only first name, last name, and suffix will appear in PubMed.

| First Name, Middle Initial* | Last Name* | Suffix* | Academic Degrees | Institution                                                              | Location (city, state/province, country) | Role or Contribution, eg, chair, principal investigator | Subgroup, eg, Steering Committee |
|-----------------------------|------------|---------|------------------|--------------------------------------------------------------------------|------------------------------------------|---------------------------------------------------------|----------------------------------|
| Claudia                     | Kawas      |         | MD               | Institute for Brain Aging and Dementia, University of California, Irvine | Irvine, CA                               | A05 Principal Investigator                              |                                  |
| Geoffrey                    | Kerchner   |         | MD               | Stanford University School of Medicine                                   | Stanford, CA                             | A05 Principal Investigator                              |                                  |
| Ronald                      | Korn       |         | MD               | Scottsdale Medical Imaging, LLC                                          | Scottsdale                               | A05 Principal Investigator                              |                                  |
| David                       | Kudrow     |         | MD               | Neurological Research Institute                                          | Santa Monica, CA                         | A05 Principal Investigator                              |                                  |
| Gil                         | Rabinovici |         | MD               | Memory and Aging Center University of California, San Francisco          | San Francisco, CA                        | A05 Principal Investigator                              |                                  |
| Bharat                      | Mocherla   |         | MD               | Las Vegas Radiology                                                      | Las Vegas, NV                            | A05 Principal Investigator                              |                                  |
| Anil                        | Nair       |         | MD               | Alzheimer Disease Center                                                 | Quincy, MA                               | A05 Principal Investigator                              |                                  |
| Brian                       | Ott        |         | MD               | Rhode Island Hospital                                                    | Providence, RI                           | A05 Principal Investigator                              |                                  |
| Edward                      | Zamrini    |         | MD               | Banner Sun Health Resarch Institute                                      | Sun City, AZ                             | A05 Principal Investigator                              |                                  |
| Carl                        | Sadowsky   |         | MD               | Premiere Research Institute                                              | West Palm Beach, FL                      | A05 Principal Investigator                              |                                  |
| Stephen                     | Salloway   |         | MD               | Butler Hospital                                                          | Providence, RI                           | A05 Principal Investigator                              |                                  |
| Frederick                   | Schaerf    |         | MD               | Neuropsychiatric Research Center of Southwest Florida                    | Ft. Meyers FL                            | A05 Principal Investigator                              |                                  |
| William                     | Shankle    |         | MD               | Hoag Memorial Hospital                                                   | Newport Beach, CA                        | A05 Principal Investigator                              |                                  |
| Robert                      | Stern      |         | MD               | Boston University School of Medicine                                     | Boston, MA                               | A05 Principal Investigator                              |                                  |
| Bryan                       | Woodruff   |         | MD               | Mayo Clinic Hospital                                                     | Scottsdale, AZ                           | A05 Principal Investigator                              |                                  |

Supplemental Online Content: Nonauthor Collaborators

\*Indicates required information. Only first name, last name, and suffix will appear in PubMed.

| First Name, Middle Initial* | Last Name* | Suffix* | Academic Degrees | Institution                                    | Location (city, state/province, country) | Role or Contribution, eg, chair, principal investigator | Subgroup, eg, Steering Committee |
|-----------------------------|------------|---------|------------------|------------------------------------------------|------------------------------------------|---------------------------------------------------------|----------------------------------|
| David                       | Wolk       |         | MD               | University of Pennsylvania, Penn Memory Center | Philadelphia, PA                         | A05 Principal Investigator                              |                                  |
| Keith                       | Johnson    |         | MD               | Massachusetts General Hospital                 | Boston, MA                               | A05 Principal Investigator                              |                                  |
| Tracy                       | Butler     |         | MD               | New York University                            | New York, NY                             | A05 Principal Investigator                              |                                  |
| Amanda                      | Smith      |         | MD               | USF Health Byrd Alzheimer's Center             | Tampa, FL                                | A05 Principal Investigator                              |                                  |
| E. Gordon                   | DePuey     |         | MD               | Mt. Sinai and St. Luke's Roosevelt Hospitals   | New York, NY                             | A05 Reader                                              |                                  |
| John S. G.                  | Edmunds    |         | MD, PhD          | Greensboro Radiology                           | Greensboro, NC                           | A05 Reader                                              |                                  |
| Brian K.                    | McCandless |         | MD               | Albany Nuclear Medicine, PC                    | Cohoes, NY                               | A05 Reader                                              |                                  |
| Joseph W.                   | Sam        |         | MD, PhD          | TRA Medical Imaging                            | Tacoma, WA                               | A05 Reader                                              |                                  |
| Bart                        | Rydzewski  |         | MD               | DXP Imaging                                    | Louisville, KY                           | A05 Reader                                              |                                  |
